# Supplementary material for: Immune reconstitution following umbilical cord blood transplantation: IRES, a study of UK paediatric patients
Source: PubMed Central journal article supplement (PMC9176140; doi:10.1002/jha2.12), 2020-05-21
Supplement: JHA2-1-208-s001.pdf [file JHA2-1-208-s001.pdf]

|                       | Sample | Cord | 1  | 2       | 3       | 6       | 12     | 18-24   | Month | Adult |
|-----------------------|--------|------|----|---------|---------|---------|--------|---------|-------|-------|
| TrB Fig 6A            |        |      |    |         |         |         |        |         |       |       |
| Number of values      |        | 19.0 |    | 11.0    | 18.0    | 20.0    | 15.0   | 8.0     |       | 19.0  |
| Mean                  |        | 21.1 |    | 38.9    | 45.9    | 25.4    | 14.8   | 14.2    |       | 4.5   |
| Std. Deviation        |        | 4.8  |    | 34.8    | 33.6    | 26.5    | 9.8    | 5.0     |       | 2.2   |
| Std. Error            |        | 1.1  |    | 10.5    | 7.9     | 5.9     | 2.5    | 1.8     |       | 0.5   |
| Lower 95% CI of mean  |        | 18.8 |    | 15.5    | 29.2    | 13.0    | 9.4    | 10.0    |       | 3.4   |
| Upper 95% CI of mean  |        | 23.4 |    | 62.3    | 62.7    | 37.8    | 20.2   | 18.4    |       | 5.6   |
| Diff in mean cf Adult |        |      | NA | 34.4    | 41.4    | 20.9    | 10.3   | 9.7     |       |       |
| SE of diff            |        |      |    | 10.5    | 7.9     | 5.9     | 2.6    | 1.9     |       |       |
| 95% CI diff from to   |        |      |    | 11.0    | 24.7    | 8.4     | 4.8    | 5.4     |       |       |
|                       |        |      |    | 57.8    | 58.2    | 33.3    | 15.8   | 14.0    |       |       |
| P                     |        |      |    | 0.0084  | <0.0001 | 0.0023  | 0.0012 | 0.0008  |       |       |
| CD19+CD27+ Fig 6B     |        |      |    |         |         |         |        |         |       |       |
| Number of values      |        | 22.0 |    | 10.0    | 17.0    | 16.0    | 15.0   | 8.0     |       | 17.0  |
| Mean                  |        | 1.1  |    | 1.1     | 3.8     | 4.8     | 7.8    | 6.8     |       | 17.0  |
| Std. Deviation        |        | 0.8  |    | 1.5     | 5.3     | 2.7     | 6.4    | 2.2     |       | 5.6   |
| Std. Error            |        | 0.2  |    | 0.5     | 1.3     | 0.7     | 1.7    | 0.8     |       | 1.4   |
| Lower 95% CI of mean  |        | 0.7  |    | 0.1     | 1.0     | 3.3     | 4.3    | 4.9     |       | 14.2  |
| Upper 95% CI of mean  |        | 1.5  |    | 2.2     | 6.5     | 6.3     | 11.4   | 8.7     |       | 19.9  |
| Diff in mean cf Adult |        |      | NA | -15.9   | -13.3   | -12.2   | -9.2   | -10.3   |       |       |
| SE of diff            |        |      |    | 1.4     | 1.9     | 1.5     | 2.1    | 1.6     |       |       |
| 95% CI diff from to   |        |      |    | -18.9   | -17.1   | -15.4   | -13.6  | -13.5   |       |       |
|                       |        |      |    | -12.9   | -9.5    | -9.1    | -4.8   | -7.0    |       |       |
| P                     |        |      |    | <0.0001 | <0.0001 | <0.0001 | 0.0002 | <0.0001 |       |       |
