# Supplementary material for: Immune reconstitution following umbilical cord blood transplantation: IRES, a study of UK paediatric patients
Source: PubMed Central journal article supplement (PMC9176140; doi:10.1002/jha2.12), 2020-05-21
Supplement: JHA2-1-208-s002.pdf [file JHA2-1-208-s002.pdf]

| Sample                  | Cord | 1       | 2       | 3       | 6      | 12    | 18-24   | Month | Adult |
|-------------------------|------|---------|---------|---------|--------|-------|---------|-------|-------|
| CD14+ 16+ Fig 7A        |      |         |         |         |        |       |         |       |       |
| Number of values        | 24.0 | 29.0    | 26.0    | 26.0    | 22.0   | 15.0  | 8.0     |       | 17.0  |
| Mean                    | 13.4 | 29.9    | 23.3    | 21.0    | 16.2   | 14.7  | 13.0    |       | 14.5  |
| Std. Deviation          | 9.0  | 15.8    | 12.6    | 12.9    | 8.5    | 9.3   | 5.7     |       | 7.3   |
| Std. Error              | 1.8  | 2.9     | 2.5     | 2.5     | 1.8    | 2.4   | 2.0     |       | 1.8   |
| Lower 95% CI of mean    | 9.6  | 23.9    | 18.2    | 15.8    | 12.4   | 9.6   | 8.2     |       | 10.8  |
| Upper 95% CI of mean    | 17.2 | 35.9    | 28.4    | 26.2    | 19.9   | 19.9  | 17.8    |       | 18.3  |
| Diff in mean cf Adult   |      | 15.3    | 8.7     | 6.5     | 1.6    | 0.2   | -1.5    |       |       |
| SE of diff              |      | 3.4     | 3.0     | 3.1     | 2.5    | 3.0   | 2.7     |       |       |
| 95% CI diff             | from | 8.4     | 2.6     | 0.2     | -3.5   | -5.9  | -7.2    |       |       |
|                         | to   | 22.2    | 14.9    | 12.7    | 6.8    | 6.3   | 4.1     |       |       |
| P                       |      | <0.0001 | 0.0065  | 0.0425  | 0.52   | 0.95  | 0.58    |       |       |
| CD56++ Fig 7B           |      |         |         |         |        |       |         |       |       |
| Number of values        | 22.0 | 28.0    | 26.0    | 26.0    | 22.0   | 15.0  | 8.0     |       | 17.0  |
| Mean                    | 16.2 | 27.8    | 41.5    | 34.6    | 25.5   | 14.0  | 18.5    |       | 6.5   |
| Std. Deviation          | 22.4 | 24.8    | 27.4    | 24.0    | 20.1   | 13.4  | 22.7    |       | 4.4   |
| Std. Error              | 4.8  | 4.7     | 5.4     | 4.7     | 4.3    | 3.5   | 8.0     |       | 1.1   |
| Lower 95% CI of mean    | 6.3  | 18.1    | 30.5    | 24.9    | 16.6   | 6.6   | -0.5    |       | 4.3   |
| Upper 95% CI of mean    | 26.2 | 37.4    | 52.6    | 44.3    | 34.4   | 21.4  | 37.5    |       | 8.8   |
| Diff in mean cf Adult   |      | 21.2    | 35.0    | 28.1    | 19.0   | 7.5   | 12.0    |       |       |
| SE of diff              |      | 4.8     | 5.5     | 4.8     | 4.4    | 3.6   | 8.1     |       |       |
| 95% CI diff             | from | 11.4    | 23.7    | 18.2    | 9.8    | -0.2  | -7.2    |       |       |
|                         | to   | 31.0    | 46.3    | 38.0    | 28.1   | 15.1  | 31.1    |       |       |
| P                       |      | 0.0001  | <0.0001 | <0.0001 | 0.0003 | 0.056 | 0.18    |       |       |
| CD56+CD16+CD62L+ Fig 7C |      |         |         |         |        |       |         |       |       |
| Number of values        | 21.0 | 26.0    | 24.0    | 24.0    | 21.0   | 14.0  | 7.0     |       | 17.0  |
| Mean                    | 3.8  | 38.0    | 27.9    | 23.1    | 18.0   | 20.3  | 18.6    |       | 3.9   |
| Std. Deviation          | 3.2  | 23.0    | 21.4    | 18.7    | 14.2   | 15.8  | 8.3     |       | 2.3   |
| Std. Error              | 0.7  | 4.5     | 4.4     | 3.8     | 3.1    | 4.2   | 3.1     |       | 0.6   |
| Lower 95% CI of mean    | 2.4  | 28.8    | 18.9    | 15.3    | 11.5   | 11.2  | 10.9    |       | 2.7   |
| Upper 95% CI of mean    | 5.3  | 47.3    | 37.0    | 31.0    | 24.4   | 29.4  | 26.3    |       | 5.1   |
| Diff in mean cf Adult   |      | 34.2    | 24.1    | 19.3    | 14.1   | 16.4  | 14.8    |       |       |
| SE of diff              |      | 4.5     | 4.4     | 3.9     | 3.2    | 4.3   | 3.2     |       |       |
| 95% CI diff             | from | 24.8    | 15.0    | 11.3    | 7.5    | 7.2   | 6.9     |       |       |
|                         | to   | 43.5    | 33.2    | 27.2    | 20.7   | 25.6  | 22.6    |       |       |
| P                       |      | <0.0001 | <0.0001 | <0.0001 | 0.0002 | 0.002 | 0.0036  |       |       |
| CD56+CD16+CD57+ Fig 7D  |      |         |         |         |        |       |         |       |       |
| Number of values        | 21.0 | 26.0    | 24.0    | 23.0    | 20.0   | 14.0  | 7.0     |       | 19.0  |
| Mean                    | 1.2  | 16.5    | 11.6    | 12.1    | 10.1   | 17.3  | 4.3     |       | 23.0  |
| Std. Deviation          | 0.6  | 18.7    | 10.8    | 10.6    | 12.6   | 20.8  | 3.4     |       | 12.3  |
| Std. Error              | 0.1  | 3.7     | 2.2     | 2.2     | 2.8    | 5.6   | 1.3     |       | 2.8   |
| Lower 95% CI of mean    | 0.9  | 9.0     | 7.0     | 7.5     | 4.2    | 5.3   | 1.1     |       | 17.1  |
| Upper 95% CI of mean    | 1.4  | 24.1    | 16.2    | 16.7    | 16.0   | 29.2  | 7.5     |       | 29.0  |
| Diff in mean cf Adult   |      | -6.5    | -11.4   | -10.9   | -12.9  | -5.8  | -18.7   |       |       |
| SE of diff              |      | 4.6     | 3.6     | 3.6     | 4.0    | 6.2   | 3.1     |       |       |
| 95% CI diff             | from | -15.9   | -18.7   | -18.2   | -21.0  | -18.8 | -25.1   |       |       |
|                         | to   | 2.8     | -4.1    | -3.6    | -4.8   | 7.3   | -12.3   |       |       |
| P                       |      | 0.17    | 0.003   | 0.0044  | 0.0026 | 0.37  | <0.0001 |       |       |
