# Supplementary material for: Immune reconstitution following umbilical cord blood transplantation: IRES, a study of UK paediatric patients
Source: PubMed Central journal article supplement (PMC9176140; doi:10.1002/jha2.12), 2020-05-21
Supplement: JHA2-1-208-s003.pdf [file JHA2-1-208-s003.pdf]

|                            | 1     |      | 2      |      | 3      |      | 6     |      | 12    |      | Month<br>Median Age |
|----------------------------|-------|------|--------|------|--------|------|-------|------|-------|------|---------------------|
| CD3+CD4-CD45RA+CD31+ Fig8A | -     | +    | -      | +    | -      | +    | -     | +    | -     | +    |                     |
| Number of values           | 9     | 13   | 7      | 10   | 10     | 13   | 10    | 10   | 11    | 4    |                     |
| Mean                       | 0.53  | 0.27 | 0.55   | 0.20 | 0.60   | 0.26 | 0.69  | 0.35 | 0.62  | 0.66 |                     |
| Std. Deviation             | 0.27  | 0.24 | 0.23   | 0.17 | 0.23   | 0.19 | 0.23  | 0.30 | 0.16  | 0.25 |                     |
| Std. Error                 | 0.09  | 0.07 | 0.09   | 0.05 | 0.07   | 0.05 | 0.07  | 0.09 | 0.05  | 0.13 |                     |
| Lower 95% CI of mean       | 0.32  | 0.12 | 0.34   | 0.08 | 0.44   | 0.15 | 0.52  | 0.14 | 0.51  | 0.26 |                     |
| Upper 95% CI of mean       | 0.74  | 0.41 | 0.76   | 0.33 | 0.77   | 0.38 | 0.86  | 0.57 | 0.73  | 1.07 |                     |
| Diff in mean Cf>median     | 0.27  |      | 0.34   |      | 0.34   |      | 0.33  |      | -0.04 |      |                     |
| SE of diff                 | 0.11  |      | 0.10   |      | 0.09   |      | 0.12  |      | 0.14  |      |                     |
| 95% CI diff from           | 0.03  |      | 0.12   |      | 0.15   |      | 0.08  |      | -0.47 |      |                     |
| to                         | 0.51  |      | 0.57   |      | 0.53   |      | 0.59  |      | 0.39  |      |                     |
| P                          | 0.032 |      | 0.0069 |      | 0.0018 |      | 0.014 |      | 0.79  |      |                     |

| CD4:CD8 Fig 8B         |      |      |       |      |       |      |        |      |       |      |
|------------------------|------|------|-------|------|-------|------|--------|------|-------|------|
| Number of values       | 9    | 11   | 7     | 10   | 10    | 13   | 10     | 10   | 11    | 4    |
| Mean                   | 4.51 | 4.44 | 5.11  | 3.31 | 4.83  | 2.87 | 5.91   | 1.65 | 2.53  | 1.40 |
| Std. Deviation         | 3.71 | 2.97 | 4.43  | 3.01 | 2.64  | 3.88 | 3.31   | 0.87 | 1.31  | 0.78 |
| Std. Error             | 1.24 | 0.90 | 1.68  | 0.95 | 0.84  | 1.08 | 1.05   | 0.28 | 0.40  | 0.39 |
| Lower 95% CI of mean   | 1.66 | 2.45 | 1.01  | 1.15 | 2.94  | 0.52 | 3.54   | 1.03 | 1.64  | 0.16 |
| Upper 95% CI of mean   | 7.36 | 6.44 | 9.21  | 5.46 | 6.72  | 5.21 | 8.27   | 2.27 | 3.41  | 2.65 |
| Diff in mean Cf>median | 0.07 |      | 1.80  |      | 1.97  |      | 4.26   |      | 1.12  |      |
| SE of diff             | 1.53 |      | 1.93  |      | 1.36  |      | 1.08   |      | 0.56  |      |
| 95% CI diff from       | 3.32 |      | -2.56 |      | -0.87 |      | 1.85   |      | -0.14 |      |
| to                     |      |      | 6.16  |      | 4.81  |      | 6.67   |      | 2.38  |      |
| P                      | 0.97 |      | 0.37  |      | 0.16  |      | 0.0028 |      | 0.074 |      |

| TrB Fig 8C             |         |  |        |       |        |       |        |       |        |       |
|------------------------|---------|--|--------|-------|--------|-------|--------|-------|--------|-------|
| Number of values       | too few |  | 3      | 8     | 7      | 11    | 8      | 11    | 11     | 4     |
| Mean                   |         |  | 10.54  | 49.58 | 54.38  | 40.58 | 31.37  | 23.32 | 18.18  | 5.53  |
| Std. Deviation         |         |  | 0.80   | 35.44 | 27.72  | 37.13 | 28.04  | 26.24 | 9.14   | 3.50  |
| Std. Error             |         |  | 0.46   | 12.53 | 10.48  | 11.19 | 9.91   | 7.91  | 2.75   | 1.75  |
| Lower 95% CI of mean   |         |  | 8.54   | 19.95 | 28.75  | 15.63 | 7.93   | 5.70  | 12.04  | -0.04 |
| Upper 95% CI of mean   |         |  | 12.53  | 79.22 | 80.02  | 65.52 | 54.81  | 40.95 | 24.31  | 11.11 |
| Diff in mean Cf>median |         |  | -39.05 |       | 13.81  |       | 8.05   |       | 12.64  |       |
| SE of diff             |         |  | 12.54  |       | 15.33  |       | 12.68  |       | 3.26   |       |
| 95% CI diff from       |         |  | -68.70 |       | -18.87 |       | -19.15 |       | 5.53   |       |
| to                     |         |  | -9.39  |       | 46.48  |       | 35.25  |       | 19.76  |       |
| P                      |         |  | 0.017  |       | 0.38   |       | 0.54   |       | 0.0022 |       |
