# Supplementary material for: Immune reconstitution following umbilical cord blood transplantation: IRES, a study of UK paediatric patients
Source: PubMed Central journal article supplement (PMC9176140; doi:10.1002/jha2.12), 2020-05-21
Supplement: JHA2-1-208-s004.pdf [file JHA2-1-208-s004.pdf]

|                      | Sample      | 1        | 2        | 3        | 6        | 12       | Month      |          |          |          |          |
|----------------------|-------------|----------|----------|----------|----------|----------|------------|----------|----------|----------|----------|
|                      | Supp Fig 1A | -        | +        | -        | +        | -        | Median Age |          |          |          |          |
| CD3                  |             |          |          |          |          |          |            |          |          |          |          |
| Number of values     |             | 10       | 20       | 10       | 16       | 11       | 15         | 10       | 12       | 11       | 4        |
| Mean                 |             | 298663   | 82479    | 365736   | 301848   | 330361   | 719343     | 1.97E+06 | 1.33E+06 | 3.29E+06 | 1.18E+06 |
| Std. Deviation       |             | 209553   | 114271   | 698920   | 500051   | 286415   | 865061     | 2.25E+06 | 2.42E+06 | 1.73E+06 | 887228   |
| Std. Error           |             | 66266    | 25552    | 221018   | 125013   | 86357    | 223358     | 710025   | 698738   | 521735   | 443614   |
| Lower 95% CI of mean |             | 148757   | 28998    | -134245  | 35391    | 137947   | 240283     | 360892   | -209376  | 2.13E+06 | -235287  |
| Upper 95% CI of mean |             | 448570   | 135961   | 865718   | 568305   | 522776   | 1.20E+06   | 3.57E+06 | 2.87E+06 | 4.45E+06 | 2.59E+06 |
| Diff in mean         | Cf>median   | 216200   |          | 63890    |          | -389000  |            | 638600   |          | 2113000  |          |
| SE of diff           |             | 71020    |          | 253900   |          | 239500   |            | 996200   |          | 684800   |          |
| 95% CI diff          | from        | 59860    |          | -480800  |          | -894300  |            | -1446000 |          | 587500   |          |
|                      | to          | 372500   |          | 608600   |          | 116300   |            | 2724000  |          | 3639000  |          |
| P                    |             | 0.0112   |          | 0.81     |          | 0.12     |            | 0.53     |          | 0.012    |          |
| Granulocyte          | Supp Fig1B  |          |          |          |          |          |            |          |          |          |          |
| Number of values     |             | 10       | 20       | 10       | 16       | 11       | 15         | 10       | 12       | 11       | 4        |
| Mean                 |             | 2.85E+06 | 1.57E+06 | 5.21E+06 | 5.13E+06 | 5.03E+06 | 7.38E+06   | 5.30E+06 | 2.92E+06 | 5.05E+06 | 1.78E+06 |
| Std. Deviation       |             | 2.28E+06 | 1.47E+06 | 3.20E+06 | 6.36E+06 | 4.52E+06 | 1.16E+07   | 2.19E+06 | 1.56E+06 | 3.61E+06 | 975957   |
| Std. Error           |             | 719404   | 328503   | 1.01E+06 | 1.59E+06 | 1.36E+06 | 2.99E+06   | 692069   | 450819   | 1.09E+06 | 487978   |
| Lower 95% CI of mean |             | 1.22E+06 | 877342   | 2.92E+06 | 1.74E+06 | 2.00E+06 | 971741     | 3.74E+06 | 1.93E+06 | 2.63E+06 | 231250   |
| Upper 95% CI of mean |             | 4.47E+06 | 2.25E+06 | 7.50E+06 | 8.52E+06 | 8.06E+06 | 1.38E+07   | 6.87E+06 | 3.92E+06 | 7.48E+06 | 3.34E+06 |
| Diff in mean         | Cf>median   | 1281000  |          | 81380    |          | -2346000 |            | 2378000  |          | 3269000  |          |
| SE of diff           |             | 790900   |          | 1884000  |          | 3282000  |            | 826000   |          | 1193000  |          |
| 95% CI diff          | from        | -442300  |          | -3817000 |          | -9215000 |            | 618100   |          | 668600   |          |
|                      | to          | 3004000  |          | 3980000  |          | 4523000  |            | 4138000  |          | 5870000  |          |
| P                    |             | 0.13     |          | 0.97     |          | 0.48     |            | 0.012    |          | 0.018    |          |
| NK Cells             | Supp Fig1C  |          |          |          |          |          |            |          |          |          |          |
| Number of values     |             | 10       | 20       | 10       | 16       | 11       | 15         | 10       | 12       | 11       | 4        |
| Mean                 |             | 251587   | 93250    | 249845   | 119672   | 252252   | 222024     | 415175   | 215685   | 470652   | 115673   |
| Std. Deviation       |             | 217891   | 87562    | 268134   | 91390    | 204680   | 222539     | 432417   | 132114   | 389468   | 64094    |
| Std. Error           |             | 68903    | 19579    | 84791    | 22848    | 61713    | 57459      | 136742   | 38138    | 117429   | 32047    |
| Lower 95% CI of mean |             | 95716    | 52269    | 58032    | 70974    | 114747   | 98785      | 105841   | 131745   | 209007   | 13684    |
| Upper 95% CI of mean |             | 407459   | 134230   | 441658   | 168370   | 389756   | 345263     | 724510   | 299624   | 732298   | 217661   |
| Diff in mean         | Cf>median   | 158300   |          | 130200   |          | 30230    |            | 199500   |          | 355000   |          |
| SE of diff           |             | 71630    |          | 87820    |          | 84320    |            | 142000   |          | 121700   |          |
| 95% CI diff          | from        | -1256    |          | -65480   |          | -144700  |            | -116800  |          | 87070    |          |
|                      | to          | 317900   |          | 325800   |          | 205100   |            | 515800   |          | 622900   |          |
| P                    |             | 0.052    |          | 0.17     |          | 0.72     |            | 0.19     |          | 0.014    |          |
| B Cells              | Supp Fig 1D |          |          |          |          |          |            |          |          |          |          |
| Number of values     |             | 10       | 20       | 10       | 16       | 11       | 15         | 10       | 12       | 11       | 4        |
| Mean                 |             | 1497     | 610.4    | 360321   | 217343   | 475768   | 525763     | 1.43E+06 | 728482   | 2.00E+06 | 721650   |
| Std. Deviation       |             | 3167     | 2481     | 795058   | 299663   | 739048   | 695312     | 1.47E+06 | 633084   | 1.23E+06 | 592321   |
| Std. Error           |             | 1002     | 554.7    | 251419   | 74916    | 222831   | 179529     | 464277   | 182756   | 370161   | 296160   |
| Lower 95% CI of mean |             | -768.5   | -550.7   | -208434  | 57664    | -20727   | 140709     | 383018   | 326245   | 1.18E+06 | -220870  |
| Upper 95% CI of mean |             | 3763     | 1771     | 929076   | 377021   | 972263   | 910818     | 2.48E+06 | 1.13E+06 | 2.83E+06 | 1.66E+06 |
| Diff in mean         | Cf>median   | 886.8    |          | 143000   |          | -50000   |            | 704800   |          | 1282000  |          |
| SE of diff           |             | 1145     |          | 262300   |          | 286200   |            | 499000   |          | 474100   |          |
| 95% CI diff          | from        | -1569    |          | -441500  |          | -646900  |            | -393400  |          | 238300   |          |
|                      | to          | 3343     |          | 727500   |          | 546900   |            | 1803000  |          | 2325000  |          |
| P                    |             | 0.45     |          | 0.6      |          | 0.86     |            | 0.19     |          | 0.021    |          |
