# Supplementary material for: Immune reconstitution following umbilical cord blood transplantation: IRES, a study of UK paediatric patients
Source: PubMed Central journal article supplement (PMC9176140; doi:10.1002/jha2.12), 2020-05-21
Supplement: JHA2-1-208-s005.pdf [file JHA2-1-208-s005.pdf]

|                        | 1        | 2        | 3        | 6        | Month Survival |
|------------------------|----------|----------|----------|----------|----------------|
| CD56+CD16+ Supp Fig 3A | -        | +        | -        | +        | -              |
| Number of values       | 8        | 22       | 4        | 22       | 5              |
| Mean                   | 190417   | 129888   | 56842    | 190265   | 69149          |
| Std. Deviation         | 169603   | 156943   | 80886    | 194782   | 64786          |
| Std. Error             | 59964    | 33460    | 40443    | 41528    | 28973          |
| Lower 95% CI of mean   | 48623    | 60303    | -71866   | 103904   | -11293         |
| Upper 95% CI of mean   | 332210   | 199473   | 185551   | 276627   | 149592         |
| Diff in mean           | 60530    | -133400  | -205100  | -258500  | -258500        |
| se of diff             | 68670    | 57970    | 55290    | 78810    | 78810          |
| 95% CI diff            | -90610   | -262600  | -319800  | -424800  | -424800        |
| P                      | 0.4      | 0.044    | 0.0012   | 0.0044   | 0.0044         |
| PDC Supp Fig 3B        |          |          |          |          |                |
| Number of values       | 8        | 21       | 3        | 18       | 4              |
| Mean                   | 3406     | 2240     | 1131     | 10861    | 1918           |
| Std. Deviation         | 3588     | 4396     | 1720     | 26422    | 1379           |
| Std. Error             | 1269     | 959.3    | 993.2    | 6228     | 689.7          |
| Lower 95% CI of mean   | 405.9    | 239      | -3142    | -2279    | -277.3         |
| Upper 95% CI of mean   | 6406     | 4241     | 5405     | 24000    | 4112           |
| Diff in mean           | 1166     | -9729    | -6400    | -13120   | -13120         |
| se of diff             | 1591     | 6306     | 2434     | 2952     | 2952           |
| 95% CI diff            | -2224    | -23040   | -11480   | -6833    | -6833          |
| P                      | 0.48     | 0.14     | 0.016    | 0.0005   | 0.0005         |
| MDC Supp Fig 3C        |          |          |          |          |                |
| Number of values       | 8        | 20       | 3        | 18       | 4              |
| Mean                   | 6057     | 4422     | 6317     | 13924    | 8522           |
| Std. Deviation         | 5278     | 7970     | 5472     | 19034    | 9704           |
| Std. Error             | 1866     | 1782     | 3159     | 4486     | 4852           |
| Lower 95% CI of mean   | 1645     | 691.7    | -7277    | 4458     | -6919          |
| Upper 95% CI of mean   | 10469    | 8152     | 19911    | 23389    | 23963          |
| Diff in mean           | 1635     | -7606    | -5250    | -10670   | -10670         |
| se of diff             | 2580     | 5487     | 5829     | 5252     | 5252           |
| 95% CI diff            | -3765    | -19560   | -24170   | 2833     | 2833           |
| P                      | 0.53     | 0.19     | 0.4      | 0.1      | 0.1            |
| Monocytes Supp Fig 3D  |          |          |          |          |                |
| Number of values       | 8        | 22       | 4        | 22       | 5              |
| Mean                   | 665447   | 640941   | 1.42E+06 | 1.12E+06 | 923621         |
| Std. Deviation         | 439992   | 656047   | 1.07E+06 | 834125   | 742088         |
| Std. Error             | 155561   | 139870   | 534285   | 177836   | 331872         |
| Lower 95% CI of mean   | 297600   | 350065   | -280892  | 752907   | 2192           |
| Upper 95% CI of mean   | 1.03E+06 | 931816   | 3.12E+06 | 1.49E+06 | 1.85E+06       |
| Diff in mean           | 24510    | 296700   | -591000  | -44900   | -44900         |
| se of diff             | 209200   | 563100   | 472800   | 184400   | 184400         |
| 95% CI diff            | -415000  | -1495000 | -1612000 | -434100  | -434100        |
| P                      | 0.91     | 0.64     | 0.23     | 0.81     | 0.81           |
