# Supplementary material for: Immune reconstitution following umbilical cord blood transplantation: IRES, a study of UK paediatric patients
Source: PubMed Central journal article supplement (PMC9176140; doi:10.1002/jha2.12), 2020-05-21
Supplement: JHA2-1-208-s006.pdf [file JHA2-1-208-s006.pdf]

|                      | Sample        |        | 1       |         | 2        |        | 3        |          | 6        |          | 12 |   | Month |
|----------------------|---------------|--------|---------|---------|----------|--------|----------|----------|----------|----------|----|---|-------|
| T Cells              | Fig 3A        |        | -       | +       | -        | +      | -        | +        | -        | +        | -  | + | ATG   |
| Number of values     | 15            | 13     | 11      | 12      | 14       | 9      | 11       | 7        | 8        | 6        |    |   |       |
| Mean                 | 229450        | 72850  | 430357  | 208767  | 764430   | 113118 | 2.60E+06 | 367855   | 2.96E+06 | 2.30E+06 |    |   |       |
| Std. Deviation       | 189516        | 152533 | 635812  | 585618  | 789611   | 122827 | 2.95E+06 | 371862   | 2.17E+06 | 1.45E+06 |    |   |       |
| Std. Error           | 48933         | 42305  | 191705  | 169053  | 211032   | 40942  | 889123   | 140550   | 767542   | 589941   |    |   |       |
| Lower 95% CI of mean | 124498        | -19324 | 3216    | -163313 | 308522   | 18705  | 623287   | 23938    | 1.14E+06 | 787666   |    |   |       |
| Upper 95% CI of mean | 334402        | 165025 | 857497  | 580846  | 1.22E+06 | 207530 | 4.59E+06 | 711772   | 4.77E+06 | 3.82E+06 |    |   |       |
| Diff in mean cf +ATG | 156600        |        | 221600  |         | 651300   |        | 2237000  |          | 651900   |          |    |   |       |
| SE of diff           | 64690         |        | 255600  |         | 215000   |        | 900200   |          | 968100   |          |    |   |       |
| 95% CI diff          | from          | 23350  | -311600 |         | 187000   |        | 230900   |          | -1479000 |          |    |   |       |
|                      | to            | 289900 | 754800  |         | 1116000  |        | 4242000  |          | 2783000  |          |    |   |       |
| P                    |               | 0.023  | 0.4     |         | 0.0097   |        | 0.032    |          | 0.52     |          |    |   |       |
| <b>B Cells</b>       | <b>Fig 3B</b> |        | -       | +       | -        | +      | -        | +        | -        | +        | -  | + | ATG   |
| Number of values     | 15            | 13     | 11      | 12      | 14       | 9      | 11       | 7        | 8        | 6        |    |   |       |
| Mean                 | 1071          | 855.2  | 366253  | 233197  | 666202   | 137231 | 1.27E+06 | 723005   | 1.79E+06 | 1.31E+06 |    |   |       |
| Std. Deviation       | 2622          | 3083   | 742024  | 355698  | 667082   | 158610 | 1.37E+06 | 911554   | 1.37E+06 | 1.07E+06 |    |   |       |
| Std. Error           | 677.1         | 855.2  | 223729  | 102681  | 178285   | 52870  | 413276   | 344535   | 485670   | 437385   |    |   |       |
| Lower 95% CI of mean | -381.4        | -1008  | -132241 | 7200    | 281040   | 15313  | 346524   | -120048  | 643692   | 186687   |    |   |       |
| Upper 95% CI of mean | 2523          | 2718   | 864747  | 459194  | 1.05E+06 | 259149 | 2.19E+06 | 1.57E+06 | 2.94E+06 | 2.44E+06 |    |   |       |
| Diff in mean cf +ATG | 220           |        | 130000  |         | 530000   |        | 540000   |          | 480000   |          |    |   |       |
| se of diff           | 1100          |        | 250000  |         | 190000   |        | 540000   |          | 650000   |          |    |   |       |
| 95% CI diff          | from          | -2000  | -390000 |         | 130000   |        | -600000  |          | -960000  |          |    |   |       |
|                      | to            | 2500   | 660000  |         | 930000   |        | 1700000  |          | 1900000  |          |    |   |       |
| P                    |               | 0.85   | 0.6     |         | 0.012    |        | 0.33     |          | 0.48     |          |    |   |       |
