# Supplementary material for: Immune reconstitution following umbilical cord blood transplantation: IRES, a study of UK paediatric patients
Source: PubMed Central journal article supplement (PMC9176140; doi:10.1002/jha2.12), 2020-05-21
Supplement: JHA2-1-208-s007.pdf [file JHA2-1-208-s007.pdf]

| Sample                     | Cord     | 1        | 2        | 3        | 6        | 12       | 18-24    | Month | Adult    |
|----------------------------|----------|----------|----------|----------|----------|----------|----------|-------|----------|
| <b>Monocytes Fig 2A</b>    |          |          |          |          |          |          |          |       |          |
| Number of values           | 24       | 30       | 26       | 26       | 22       | 15       | 8        |       | 17       |
| Mean                       | 816663   | 647476   | 1.17E+06 | 1.40E+06 | 997265   | 786321   | 796895   |       | 504036   |
| Std. Deviation             | 566492   | 598764   | 856377   | 1.43E+06 | 606499   | 614811   | 430085   |       | 207269   |
| Std. Error                 | 115635   | 109319   | 167949   | 280802   | 129306   | 158743   | 152058   |       | 50270    |
| Lower 95% CI of mean       | 577457   | 423890   | 822488   | 822680   | 728358   | 445847   | 437331   |       | 397468   |
| Upper 95% CI of mean       | 1.06E+06 | 871061   | 1.51E+06 | 1.98E+06 | 1.27E+06 | 1.13E+06 | 1.16E+06 |       | 610604   |
| Diff in mean cf Adult      |          | 143400   | 664400   | 897000   | 493200   | 282300   | 292900   |       |          |
| SE of diff                 |          | 120300   | 175300   | 285300   | 138700   | 166500   | 160200   |       |          |
| 95% CI diff                |          | from     | from     | from     | from     | from     | from     |       |          |
|                            |          | to       | to       | to       | to       | to       | to       |       |          |
|                            |          | -99900   | 305800   | 310500   | 208500   | -70720   | -76450   |       |          |
|                            |          | 386900   | 1023000  | 1483000  | 777900   | 635300   | 662200   |       |          |
| P                          |          | 0.24     | 0.0007   | 0.0041   | 0.0014   | 0.11     | 0.10     |       |          |
| <b>Granulocytes Fig 2B</b> |          |          |          |          |          |          |          |       |          |
| Number of values           | 24       | 30       | 26       | 26       | 22       | 15       | 8        |       | 17       |
| Mean                       | 4.98E+06 | 1.99E+06 | 5.16E+06 | 6.38E+06 | 4.01E+06 | 4.18E+06 | 4.69E+06 |       | 3.21E+06 |
| Std. Deviation             | 2.95E+06 | 1.84E+06 | 5.29E+06 | 9.19E+06 | 2.19E+06 | 3.43E+06 | 3.09E+06 |       | 1.31E+06 |
| Std. Error                 | 601891   | 336523   | 1.04E+06 | 1.80E+06 | 467064   | 885538   | 1.09E+06 |       | 317052   |
| Lower 95% CI of mean       | 3.74E+06 | 1.30E+06 | 3.03E+06 | 2.67E+06 | 3.03E+06 | 2.28E+06 | 2.11E+06 |       | 2.53E+06 |
| Upper 95% CI of mean       | 6.23E+06 | 2.68E+06 | 7.30E+06 | 1.01E+07 | 4.98E+06 | 6.08E+06 | 7.27E+06 |       | 3.88E+06 |
| Diff in mean cf Adult      |          | -1215000 | 1956000  | 3178000  | 798100   | 975000   | 1482000  |       |          |
| SE of diff                 |          | 462400   | 1084000  | 1830000  | 564500   | 940600   | 1136000  |       |          |
| 95% CI diff                |          | from     | from     | from     | from     | from     | from     |       |          |
|                            |          | to       | to       | to       | to       | to       | to       |       |          |
|                            |          | -2148000 | -260600  | -585000  | -348700  | -1010000 | -1137000 |       |          |
|                            |          | -281200  | 4173000  | 6940000  | 1945000  | 2960000  | 4102000  |       |          |
| P                          |          | 0.012    | 0.082    | 0.094    | 0.17     | 0.31     | 0.23     |       |          |
| <b>T Cells Fig 2C</b>      |          |          |          |          |          |          |          |       |          |
| Number of values           | 24       | 30       | 26       | 26       | 22       | 15       | 8        |       | 17       |
| Mean                       | 2.37E+06 | 154541   | 326420   | 554774   | 1.62E+06 | 2.73E+06 | 2.97E+06 |       | 1.49E+06 |
| Std. Deviation             | 1.75E+06 | 181458   | 571744   | 700205   | 2.31E+06 | 1.80E+06 | 1.29E+06 |       | 939480   |
| Std. Error                 | 356219   | 33130    | 112128   | 137322   | 492462   | 464989   | 456311   |       | 227857   |
| Lower 95% CI of mean       | 1.64E+06 | 86782    | 95488    | 271955   | 594647   | 1.73E+06 | 1.89E+06 |       | 1.01E+06 |
| Upper 95% CI of mean       | 3.11E+06 | 222299   | 557353   | 837593   | 2.64E+06 | 3.72E+06 | 4.05E+06 |       | 1.98E+06 |
| Diff in mean cf Adult      |          | -1338000 | -1166000 | -937600  | 126400   | 1234000  | 1473000  |       |          |
| SE of diff                 |          | 230300   | 254000   | 266000   | 542600   | 517800   | 510000   |       |          |
| 95% CI diff                |          | from     | from     | from     | from     | from     | from     |       |          |
|                            |          | to       | to       | to       | to       | to       | to       |       |          |
|                            |          | -1826000 | -1691000 | -1484000 | -983300  | 153700   | 336800   |       |          |
|                            |          | -849700  | -640500  | -391700  | 1236000  | 2314000  | 2610000  |       |          |
| P                          |          | <0.0001  | 0.0001   | 0.0015   | 0.8175   | 0.0272   | 0.0162   |       |          |
| <b>B Cells Fig 2D</b>      |          |          |          |          |          |          |          |       |          |
| Number of values           | 24       | 30       | 26       | 26       | 22       | 15       | 8        |       | 17       |
| Mean                       | 659637   | 906      | 272334   | 504611   | 1.05E+06 | 1.66E+06 | 1.40E+06 |       | 289618   |
| Std. Deviation             | 628890   | 2707     | 535232   | 699892   | 1.12E+06 | 1.22E+06 | 827922   |       | 187161   |
| Std. Error                 | 128372   | 494.2    | 104968   | 137260   | 239580   | 315804   | 292714   |       | 45393    |
| Lower 95% CI of mean       | 394082   | -104.7   | 56149    | 221919   | 550616   | 984260   | 712162   |       | 193388   |
| Upper 95% CI of mean       | 925191   | 1917     | 488519   | 787304   | 1.55E+06 | 2.34E+06 | 2.10E+06 |       | 385847   |
| Diff in mean cf Adult      |          | -288700  | -17280   | 215000   | 759200   | 1372000  | 1115000  |       |          |
| SE of diff                 |          | 45400    | 114400   | 144600   | 243800   | 319000   | 296200   |       |          |
| 95% CI diff                |          | from     | from     | from     | from     | from     | from     |       |          |
|                            |          | to       | to       | to       | to       | to       | to       |       |          |
|                            |          | -385000  | -250100  | -80220   | 253500   | 687600   | 414200   |       |          |
|                            |          | -192500  | 215500   | 510200   | 1265000  | 2056000  | 1815000  |       |          |
| P                          |          | <0.0001  | 0.88     | 0.15     | 0.0051   | 0.0007   | 0.0070   |       |          |
| <b>NK Cells Fig 2E</b>     |          |          |          |          |          |          |          |       |          |
| Number of values           | 22       | 30       | 26       | 26       | 22       | 15       | 8        |       | 17       |
| Mean                       | 690758   | 198246   | 274998   | 337896   | 402654   | 409671   | 371387   |       | 242938   |
| Std. Deviation             | 654202   | 178439   | 233166   | 267169   | 379246   | 384614   | 135029   |       | 132478   |
| Std. Error                 | 139476   | 32578    | 45728    | 52396    | 80856    | 99307    | 47740    |       | 32131    |
| Lower 95% CI of mean       | 400701   | 131615   | 180820   | 229985   | 234505   | 196677   | 258498   |       | 174824   |
| Upper 95% CI of mean       | 980816   | 264877   | 369176   | 445808   | 570803   | 622665   | 484275   |       | 311052   |
| Diff in mean cf Adult      |          | -44690   | 32060    | 94960    | 159700   | 166700   | 128400   |       |          |
| SE of diff                 |          | 45760    | 55890    | 61460    | 87010    | 104400   | 57550    |       |          |
| 95% CI diff                |          | from     | from     | from     | from     | from     | from     |       |          |
|                            |          | to       | to       | to       | to       | to       | to       |       |          |
|                            |          | -137100  | -80890   | -29520   | -18820   | -54540   | 4150     |       |          |
|                            |          | 47740    | 145000   | 219400   | 338300   | 388000   | 252700   |       |          |
| P                          |          | 0.33     | 0.57     | 0.13     | 0.077    | 0.13     | 0.044    |       |          |
| <b>NKT Cells Fig 2F</b>    |          |          |          |          |          |          |          |       |          |
| Number of values           | 20       | 30       | 26       | 26       | 22       | 15       | 8        |       | 17       |
| Mean                       | 55452    | 1803     | 4691     | 12601    | 49832    | 26002    | 17788    |       | 33691    |
| Std. Deviation             | 55471    | 4714     | 8507     | 21142    | 163664   | 51892    | 15590    |       | 17249    |
| Std. Error                 | 12404    | 860.7    | 1668     | 4146     | 34893    | 13399    | 5512     |       | 4183     |
| Lower 95% CI of mean       | 29491    | 42.45    | 1255     | 4062     | -22733   | -2736    | 4754     |       | 24822    |
| Upper 95% CI of mean       | 81414    | 3563     | 8127     | 21141    | 122397   | 54739    | 30821    |       | 42559    |
| Diff in mean cf Adult      |          | -32000   | -29000   | -21000   | 16000    | -7700    | -16000   |       |          |
| SE of diff                 |          | 4300     | 4500     | 5900     | 35000    | 14000    | 6900     |       |          |
| 95% CI diff                |          | from     | from     | from     | from     | from     | from     |       |          |
|                            |          | to       | to       | to       | to       | to       | to       |       |          |
|                            |          | -41000   | -38000   | -33000   | -57000   | -37000   | -31000   |       |          |
|                            |          | -23000   | -20000   | -9200    | 89000    | 22000    | -1200    |       |          |
| P                          |          | <0.0001  | <0.0001  | 0.001    | 0.65     | 0.59     | 0.036    |       |          |
| <b>MDC Fig 2G</b>          |          |          |          |          |          |          |          |       |          |
| Number of values           | 6        | 21       | 18       | 21       | 19       | 15       | 6        |       | 10       |
| Mean                       | 10746    | 7162     | 14977    | 14083    | 16910    | 16593    | 23894    |       | 9435     |
| Std. Deviation             | 8650     | 719      | 18456    | 13380    | 13603    | 12607    | 9319     |       | 7485     |
| Std. Error                 | 3531     | 1684     | 4350     | 2920     | 3121     | 3255     | 3804     |       | 2367     |
| Lower 95% CI of mean       | 1669     | 3648     | 5799     | 7993     | 10354    | 9611     | 14115    |       | 4080     |
| Upper 95% CI of mean       | 19824    | 10676    | 24155    | 20174    | 23467    | 23574    | 33674    |       | 14790    |
| Diff in mean cf Adult      |          | -2273    | 5542     | 4648     | 7475     | 7158     | 14460    |       |          |
| SE of diff                 |          | 2905     | 4952     | 3759     | 3917     | 4025     | 4481     |       |          |
| 95% CI diff                |          | from     | from     | from     | from     | from     | from     |       |          |
|                            |          | to       | to       | to       | to       | to       | to       |       |          |
|                            |          | -8377    | -4680    | -3050    | -577.7   | -1190    | 4127     |       |          |
|                            |          | 3831     | 15760    | 12350    | 15530    | 15510    | 24790    |       |          |
| P                          |          | 0.44     | 0.27     | 0.23     | 0.067    | 0.089    | 0.012    |       |          |
| <b>PDC Fig 2H</b>          |          |          |          |          |          |          |          |       |          |
| Number of values           | 7        | 21       | 18       | 21       | 19       | 15       | 6        |       | 10       |
| Mean                       | 14978    | 3538     | 11049    | 7890     | 12657    | 12273    | 16797    |       | 13947    |
| Std. Deviation             | 14560    | 4539     | 26350    | 9722     | 11756    | 11343    | 11098    |       | 10315    |
| Std. Error                 | 5503     | 990.4    | 6211     | 2122     | 2697     | 2929     | 4531     |       | 3262     |
| Lower 95% CI of mean       | 1512     | 1471     | -2054    | 3465     | 6991     | 5991     | 5150     |       | 6568     |
| Upper 95% CI of mean       | 28444    | 5604     | 24153    | 12316    | 18324    | 18555    | 28443    |       | 21326    |
| Diff in mean cf Adult      |          | -10410   | -2898    | -6056    | -1289    | -1674    | 2850     |       |          |
| SE of diff                 |          | 3409     | 7015     | 3891     | 4232     | 4384     | 5583     |       |          |
| 95% CI diff                |          | from     | from     | from     | from     | from     | from     |       |          |
|                            |          | to       | to       | to       | to       | to       | to       |       |          |
|                            |          | -18000   | -17380   | -14310   | -10120   | -10820   | -9588    |       |          |
|                            |          | -2814    | 11580    | 2192     | 7539     | 7471     | 15290    |       |          |
| P                          |          | 0.012    | 0.68     | 0.14     | 0.76     | 0.71     | 0.62     |       |          |
