# Supplementary material for: Immune reconstitution following umbilical cord blood transplantation: IRES, a study of UK paediatric patients
Source: PubMed Central journal article supplement (PMC9176140; doi:10.1002/jha2.12), 2020-05-21
Supplement: JHA2-1-208-s009.pdf [file JHA2-1-208-s009.pdf]

| Sample                | Cord    | 1        | 2       | 3      | 6       | 12       | 18-24    | Month | Adult  |
|-----------------------|---------|----------|---------|--------|---------|----------|----------|-------|--------|
| CD3+CD4+CD11+ Fig 5C  |         |          |         |        |         |          |          |       |        |
| Number of values      | 20      | 17       | 15      | 21     | 18      | 13       | 7        |       | 19     |
| Mean                  | 0.4935  | 5.952    | 15.43   | 9.511  | 5.745   | 2.816    | 5.203    |       | 3.047  |
| Std. Deviation        | 0.3304  | 6.597    | 21.1    | 12.11  | 8.182   | 3.756    | 5.324    |       | 2.408  |
| Std. Error            | 0.07388 | 1.6      | 5.449   | 2.643  | 1.928   | 1.042    | 2.012    |       | 0.5524 |
| Lower 95% CI of mean  | 0.3389  | 2.561    | 3.744   | 3.998  | 1.676   | 0.5464   | 0.2785   |       | 1.887  |
| Upper 95% CI of mean  | 0.6481  | 9.344    | 27.12   | 15.02  | 9.814   | 5.086    | 10.13    |       | 4.208  |
| Diff in mean cf Adult |         | 2.905    | 12.38   | 6.464  | 2.698   | -0.2312  | 2.155    |       |        |
| SE of diff            |         | 1.693    | 5.477   | 2.7    | 2.006   | 1.179    | 2.087    |       |        |
| 95% CI diff from      |         | -0.6376  | 0.6353  | 0.8474 | -1.501  | -2.709   | -2.951   |       |        |
| to                    |         | 6.448    | 24.13   | 12.08  | 6.896   | 2.246    | 7.262    |       |        |
| P                     |         | 0.1      | 0.04    | 0.026  | 0.2     | 0.85     | 0.34     |       |        |
| CD3+CD4-CD161+ Fig 5D |         |          |         |        |         |          |          |       |        |
| Number of values      | 20      | 19       | 16      | 21     | 17      | 13       | 7        |       | 19     |
| Mean                  | 4.839   | 3.047    | 5.698   | 3.982  | 3.841   | 3.915    | 3.777    |       | 10.75  |
| Std. Deviation        | 2.366   | 2.408    | 3.73    | 6.227  | 3.527   | 3.797    | 2.216    |       | 7.714  |
| Std. Error            | 0.5292  | 0.5524   | 0.9325  | 1.359  | 0.8554  | 1.053    | 0.8375   |       | 1.77   |
| Lower 95% CI of mean  | 3.731   | 1.887    | 3.71    | 1.148  | 2.027   | 1.62     | 1.728    |       | 7.034  |
| Upper 95% CI of mean  | 5.946   | 4.208    | 7.685   | 6.817  | 5.654   | 6.209    | 5.826    |       | 14.47  |
| Diff in mean cf Adult |         | -7.705   | -5.055  | -6.77  | -6.912  | -6.838   | -6.975   |       |        |
| SE of diff            |         | 1.854    | 2       | 2.231  | 1.966   | 2.059    | 1.958    |       |        |
| 95% CI diff from      |         | -11.56   | -9.168  | -11.31 | -10.96  | -11.06   | -11.03   |       |        |
| to                    |         | -3.849   | -0.9422 | -2.233 | -2.863  | -2.612   | -2.924   |       |        |
| P                     |         | 0.0004   | 0.018   | 0.0046 | 0.0017  | 0.0026   | 0.0017   |       |        |
| CD3+CD57+ Fig 5E      |         |          |         |        |         |          |          |       |        |
| Number of values      | 21      | 16       | 15      | 21     | 19      | 15       | 7        |       | 19     |
| Mean                  | 0.1629  | 5.548    | 4.513   | 6.565  | 5.372   | 8.039    | 0.9157   |       | 5.864  |
| Std. Deviation        | 0.1102  | 10.44    | 4.314   | 8.533  | 10.26   | 18.16    | 0.9373   |       | 4.978  |
| Std. Error            | 0.02405 | 2.61     | 1.114   | 1.862  | 2.354   | 4.69     | 0.3543   |       | 1.142  |
| Lower 95% CI of mean  | 0.1127  | -0.01388 | 2.124   | 2.68   | 0.4262  | -2.02    | 0.04887  |       | 3.464  |
| Upper 95% CI of mean  | 0.213   | 11.11    | 6.902   | 10.45  | 10.32   | 18.1     | 1.783    |       | 8.263  |
| Diff in mean cf Adult |         | -0.3156  | -1.351  | 0.7011 | -0.4916 | 2.175    | -4.948   |       |        |
| SE of diff            |         | 2.848    | 1.595   | 2.184  | 2.617   | 4.827    | 1.196    |       |        |
| 95% CI diff from      |         | -6.257   | -4.605  | -3.75  | -5.871  | -8.111   | -7.435   |       |        |
| to                    |         | 5.626    | 1.903   | 5.153  | 4.888   | 12.46    | -2.461   |       |        |
| P                     |         | 0.91     | 0.4     | 0.75   | 0.85    | 0.66     | 0.0005   |       |        |
| Treg Fig 2F           |         |          |         |        |         |          |          |       |        |
| Number of values      | 22      | 19       | 17      | 22     | 20      | 14       | 8        |       | 20     |
| Mean                  | 6.305   | 8.773    | 10.02   | 7.301  | 9.081   | 6.915    | 8.858    |       | 4.951  |
| Std. Deviation        | 1.524   | 5.712    | 6.224   | 3.826  | 4.864   | 3.008    | 4.668    |       | 2.261  |
| Std. Error            | 0.3248  | 1.31     | 1.51    | 0.8158 | 1.088   | 0.8039   | 1.65     |       | 0.5055 |
| Lower 95% CI of mean  | 5.629   | 6.019    | 6.817   | 5.605  | 6.805   | 5.178    | 4.956    |       | 3.892  |
| Upper 95% CI of mean  | 6.98    | 11.53    | 13.22   | 8.998  | 11.36   | 8.652    | 12.76    |       | 6.009  |
| Diff in mean cf Adult |         | 3.822    | 5.067   | 2.351  | 4.131   | 1.964    | 3.908    |       |        |
| SE of diff            |         | 1.405    | 1.592   | 0.9597 | 1.199   | 0.9497   | 1.726    |       |        |
| 95% CI diff from      |         | 0.916    | 1.735   | 0.399  | 1.665   | -0.00532 | -0.07238 |       |        |
| to                    |         | 6.728    | 8.399   | 4.302  | 6.597   | 3.934    | 7.888    |       |        |
| P                     |         | 0.012    | 0.0049  | 0.02   | 0.002   | 0.051    | 0.053    |       |        |
