# Supplementary material for: Immune reconstitution following umbilical cord blood transplantation: IRES, a study of UK paediatric patients
Source: PubMed Central journal article supplement (PMC9176140; doi:10.1002/jha2.12), 2020-05-21
Supplement: JHA2-1-208-s010.pdf [file JHA2-1-208-s010.pdf]

| CD4:CD8               |      | Supp Fig 2B |      |      |      |      |       |       |       |
|-----------------------|------|-------------|------|------|------|------|-------|-------|-------|
|                       | Cord | 1           | 2    | 3    | 6    | 12   | 18-24 | Month | Adult |
| Number of values      | 22   | 20          | 17   | 23   | 20   | 15   | 8     |       | 19    |
| Mean                  | 2.8  | 4.5         | 4.0  | 3.7  | 3.8  | 2.2  | 2.3   |       | 2.9   |
| Std. Deviation        | 0.8  | 3.2         | 3.6  | 3.5  | 3.2  | 1.3  | 1.0   |       | 1.4   |
| Std. Error            | 0.2  | 0.7         | 0.9  | 0.7  | 0.7  | 0.3  | 0.3   |       | 0.3   |
| Lower 95% CI of mean  | 2.5  | 3.0         | 2.2  | 2.2  | 2.3  | 1.5  | 1.4   |       | 2.2   |
| Upper 95% CI of mean  | 3.2  | 6.0         | 5.9  | 5.2  | 5.3  | 2.9  | 3.1   |       | 3.6   |
| Diff in mean cf Adult |      | 1.6         | 1.1  | 0.8  | 0.9  | -0.7 | -0.7  |       |       |
| SE of diff            |      | 0.8         | 0.9  | 0.8  | 0.8  | 0.5  | 0.5   |       |       |
| 95% CI diff from      |      | -0.1        | -0.8 | -0.8 | -0.8 | -1.6 | -1.7  |       |       |
| to                    |      | 3.2         | 3.1  | 2.4  | 2.5  | 0.3  | 0.3   |       |       |
| P                     |      | 0.061       | 0.25 | 0.32 | 0.29 | 0.15 | 0.18  |       |       |

| CD4:CD8              |        | Supp Fig 2C |        |        |        |       |        |          |        |        |  |
|----------------------|--------|-------------|--------|--------|--------|-------|--------|----------|--------|--------|--|
|                      | 1      | 2           | 3      | 6      | 12     | Month | ATG    |          |        |        |  |
|                      | -      | +           | -      | +      | -      | +     | -      | +        |        |        |  |
| Number of values     | 13     | 4           | 11     | 3      | 14     | 6     | 11     | 5        | 8      | 6      |  |
| Mean                 | 5.535  | 1.975       | 5.212  | 1.497  | 3.864  | 4.393 | 3.876  | 4.958    | 2.399  | 2.048  |  |
| Std. Deviation       | 3.337  | 2.063       | 3.969  | 1.656  | 3.927  | 2.739 | 3.014  | 4.057    | 1.525  | 1.088  |  |
| Std. Error           | 0.9254 | 1.032       | 1.197  | 0.9558 | 1.05   | 1.118 | 0.9089 | 1.815    | 0.5392 | 0.444  |  |
| Lower 95% CI of mean | 3.518  | -1.308      | 2.546  | -2.616 | 1.597  | 1.519 | 1.851  | -0.07996 | 1.124  | 0.9069 |  |
| Upper 95% CI of mean | 7.551  | 5.258       | 7.878  | 5.609  | 6.132  | 7.268 | 5.901  | 9.996    | 3.674  | 3.19   |  |
| Diff in mean cf +ATG |        | 3.56        | 3.715  |        | -0.529 |       | -1.082 |          | 0.3504 |        |  |
| SE of diff           |        | 1.386       | 1.531  |        | 1.534  |       | 2.029  |          | 0.6985 |        |  |
| 95% CI diff from     |        | 0.3637      | 0.1835 |        | -3.842 |       | -6.048 |          | -1.187 |        |  |
| to                   |        | 6.756       | 7.247  |        | 2.784  |       | 3.884  |          | 1.888  |        |  |
| P                    |        | 0.033       | 0.042  |        | 0.74   |       | 0.61   |          | 0.63   |        |  |
